1           The Conceptualization and Preliminary Evaluation of a Dynamic, Mechanistic  
2           Mathematical Model to Assess the Water Footprint of Beef Cattle Production

3

4   Hector M. Menendez III<sup>1,#,\*</sup>, Alberto S. Atzori<sup>2¶</sup>, and Luis O. Tedeschi<sup>1¶</sup>

5   <sup>1</sup> Department of Animal Science, Texas A&M University, College Station, Texas, United  
6   States of America

7

8   <sup>2</sup> Sezione di Scienze Zootecniche, Dipartimento di Agraria, University of Sassari,  
9   Sassari, Italy

10

11   \* Corresponding author: Email: [hector.menendez@usda.gov](mailto:hector.menendez@usda.gov)

12

13   # Current address: United States Department of Agriculture-Agricultural Research

14   Service, College Station, Texas, United States of America

15

16   ¶These authors contributed equally to this work.

17

18

## 19 **Abstract**

20           The water footprint assessment method has helped to bring livestock water use  
21 to the forefront of research to address water challenges under the ecological footprint  
22 perspective. The current assessment methods of water use make a meaningful  
23 assessment of livestock water use difficult as they are mainly static, thus poorly  
24 adaptable to understand future scenarios of water use and requirements. They lack the  
25 integration of fundamental ruminant nutrition and growth equations within a dynamic  
26 context that accounts for short and long-term behavior and time delays associated with  
27 economically important beef producing areas. This study utilized the System Dynamics  
28 methodology to conceptualize a water footprint for ruminants within a dynamic and  
29 mechanistic modeling framework. The problem of beef cattle livestock water footprint  
30 assessment was articulated, and a dynamic hypothesis was formed to represent the  
31 Texas livestock water use system as the initial step in developing the Texas Beef Water  
32 Footprint model (**TXWFB**). The fulfillment of the dynamic hypothesis required the  
33 development of three causal loop diagrams (**CLD**): cattle population, growth and  
34 nutrition, and the livestock water footprint. The CLD provided a framework that captured  
35 the daily water footprint of beef (**WF<sub>B</sub>**) of the cow-calf, stocker, and feedlot phases and  
36 the entire beef supply chain. Preliminary simulations captured the oscillatory behavior of  
37 the Texas cattle population and overshoot and collapse behavior, under conditions  
38 when regional livestock water resources became scarce. Sensitivity analysis from the  
39 hypothesized CLD structures indicated that forage quality was less of an impact on the  
40 daily **WF<sub>B</sub>** of each cattle phase compared to the use of high concentrate feeds. This

41 study provided a framework concept for the development of a dynamic water footprint  
42 model for Texan's beef cattle production and water sustainability.

43

## 44 **Introduction**

45 Global demand for water resources has created much pressure for sectors that  
46 have large water footprints (1). These sectors include industry, household, and  
47 agriculture. Within the agriculture sector, livestock production has received a large  
48 amount of scrutiny. It has created the impetus for assessing and reducing livestock  
49 water use. Initial efforts to understand, quantify, and standardize livestock water use  
50 have been made by the Water Footprint Network, the International Standards  
51 Organization, and the Food and Agriculture Organization, amongst many other methods  
52 (2). Most livestock water use methods include some form of the water footprint  
53 assessment (**WFA**) method developed by Hoekstra in 2002 (3). The WFA includes the  
54 quantification of three specific water types, green (rainfed), blue (ground or surface),  
55 and grey (waste treatment) water uses that account for the total direct, and indirect  
56 water (i.e., virtual water) used to produce a product (4) .

57 Current livestock water use literature indicates that beef cattle have the most  
58 significant water use among different livestock, making the quantification of beef water  
59 use the predominant area of interest and investigation. However, beef cattle also have  
60 the broadest range of water footprint values caused by numerous water use  
61 methodologies and the associated interpretations of their results combined with broad  
62 differences in production efficiency. The most notable difference between beef water  
63 use methodologies is how they account for green, blue, and grey waters, if at all, and

64 their functional unit. Consistency is another problem. For example, livestock water use  
65 may be in liters of water per kg of live weight, hundredweight, carcass weight, or  
66 boneless beef. Additionally, regional and environmental considerations may further  
67 change the functional unit into an index of scarcity based on available and returned  
68 water use over a given period (e.g., a month) (5).

69 Legesse et al. (2) provide a comprehensive review of current methodologies to  
70 assess beef livestock water use, and more recently, the Food and Agriculture  
71 Organization (6) published a standardized methodology for livestock water use systems  
72 and supply chains. Standardizing the evaluation of livestock water use is essential to  
73 determine the actual resource consumption and allocation per area (e.g., country or  
74 state). Water use evaluation also helps to indicate levels of unsustainable water use  
75 and water scarcity and provides a benchmark to improve upon (7–9). Therefore, one  
76 can optimize the management of world freshwater resources based on the water  
77 footprint, because it considers direct and indirect use of all components of the water  
78 usage geographically (e.g., country, province, state) and temporally. Despite these  
79 tremendous efforts, the current methodologies are still based on static frameworks,  
80 limited periods of assessment, and neglect to capture the structure of the problem of  
81 livestock water use quantification. It presents a big limit to forecast water use by  
82 production sectors, to formulate or simulate possible scenarios for future water  
83 management in the production areas and to evaluate technical strategies to improve  
84 water use efficiency in the production chains. Animals are grown in dynamic,  
85 continuous systems that receive feedback from climate, soil, available feed, and supply  
86 chain dynamics. Tedeschi and Fox (10) described the evolution of computer-based

87 simulation models to adequately evaluate ruminant livestock feed and water  
88 requirements. However, there has been no attempt to link animal growth, the plane of  
89 nutrition, and water requirement in a dynamic, long-term assessment. Current livestock  
90 water use methodologies are missing these equations and fail to account for continuous  
91 diurnal physiological and environmental processes (Fig 1). Furthermore, these  
92 processes are often delayed in time and are dynamically interconnected through  
93 powerful feedback mechanisms that influence daily and total water use. Turner et al.  
94 (11), for example, described numerous agriculture examples of the need for a dynamic  
95 methodology to solve complex agriculture challenges more adequately. Few  
96 researchers (12–18) have published dynamic models relating to cattle that provide  
97 meaningful perspective and high-leverage policies to influence systems over the long-  
98 term. Therefore, there is a need to more critically evaluate the beef water footprint  
99 (**WF<sub>B</sub>**) using available cutting-edge ruminant nutrition and growth equations (10) with a  
100 dynamic framework to advance available water footprint assessment methodologies  
101 and perform various, highly functional and rapid, policy analyses.

102  
103 **Fig 1. Overview of equations types in various models.** Equation sources include the  
104 Water Footprint Assessment (**WFA**), Ruminant Nutrition System (**RNS**), National  
105 Academies of Science, Engineering and Medicine (**NASEM**) and the Texas Beef Cattle  
106 Water Footprint (**TXWFB**) Models and their equation types.

107  
108         Within the United States, an area that is economically dependent on beef cattle  
109 production is Texas, one of the top-five cattle producing states (19). Texas also covers

110 many large and diverse geographical and climatic regions in which the three major  
111 phases of beef production exists. Additionally, management of cattle in each region  
112 have their own respective ecological and resource limitations (e.g. drought,  
113 unproductive soils) and benefits (water availability, favorable climates). Thus, this study  
114 focuses on Texas, at a state level of aggregation, for the development the conceptual  
115 framework due to its robust representation of beef cattle production under many  
116 ecological and climatic regions.

117 The first objective of this study was to describe relevant information about the  
118 water use processes involved in beef cattle production at the ranching level for  
119 developing a dynamic water footprint model. The second objective was to conceptualize  
120 these processes into a dynamic framework (i.e., dynamic hypothesis) that would allow a  
121 dynamic water footprint model to be developed and evaluated. The third objective was  
122 to provide preliminary calibration of the proposed dynamic framework to improve its  
123 ability to capture important feedback signals in cattle water use over time and assess its  
124 suitability for model formulation (i.e., the addition of equations).

## 125 **Material and methods**

### 126 **System dynamics methodology**

127 The primary objective of improving existing  $WF_B$  WFA was accomplished by  
128 applying the System Dynamics (**SD**) methodology in developing our model framework.  
129 The SD methodology is an approach well adapted to understanding complex systems  
130 (20,21). Complexity in water management is related to non-linear dynamics which are  
131 non-linear relationships between variables that may have a tremendous influence on a  
132 system's behavior or none. For example, cattle may accumulate heat over a given time.

133 However, it is not until a point at which their body can no longer maintain homeostasis  
134 that declines in feed intake are observed. These non-linear dynamics are guided by  
135 feedback mechanisms (i.e., loops) that can be reinforcing (e.g., accumulation of heat) or  
136 balancing (e.g., decrease in feed intake) whose influences are delayed over time. Often,  
137 the unintended consequences of decisions in the cattle industry are difficult to  
138 understand and change because managers react to events (e.g., diminished feed  
139 intake) instead of understanding the structure (i.e., environmental exposure, body  
140 condition, breed type, feed type) that is driving the system.

141 This approach uses a high level of aggregation to describe the overarching  
142 structure of a system in which the problem exists and captures important non-linear  
143 dynamics, feedbacks, and time delays that are responsible for the inertia that drives the  
144 system behavior. The modeling process is based on well defined steps approaching  
145 system understanding. Step one enables the problem to be clearly articulated and  
146 defined, explicitly states what the model aims to understand and resolves the purpose  
147 of the model. Step two, dynamic hypothesis formulation, describes the model  
148 boundaries clearly, it consists of a concise statement or causal loop diagram that clearly  
149 describes the hypothesized endogenous (variables that are part of the feedback  
150 dynamics) structure that drives the problem behavior. Exogenous variables, according  
151 to SD nomenclature, are variables that do not receive feedback from variables within  
152 the system. Problem articulation and formulation of a dynamic hypothesis are iterative  
153 processes and should improve throughout the modeling process. This study utilized  
154 steps one and two of the SD method to articulate the problem and develop several  
155 causal loop diagrams (**CLD**; diagram of endogenous variables) that resulted in a

156 dynamic hypothesis CLD and statement. Steps one and two were accomplished by  
157 conducting an extensive review of literature, identifying key variables, using expert  
158 knowledge, and published SD models to best capture the structure of the system in  
159 which the problem exists.

## 160 **Problem statement and dynamic hypothesis**

161 The dynamic problem statement included the definition of the lack of knowledge  
162 limiting an accurate determination of Texas beef waterfootprint and its use to formulate,  
163 and test, adequate policies for efficient resource use. The problem statement focused on  
164 the model conceptualization with the inclusion of key variables from the beef chain  
165 (regarding herd dynamics, productivity, management of growing phases, commercial  
166 trade, environmental constraints, etc) and strongly affecting water use at farm and  
167 regional level.

168 The dynamic hypothesis expresses the hypothesized structure of the system in  
169 which the problem of current WFA  $WF_B$  assessment exists (Fig 2) and was used to  
170 develop specific conceptual submodels that, when aggregated, represent the core Texas  
171 Beef Water Footprint model (TXWFB) parameters and boundaries. Local, domestic, and  
172 international water resources attribute to the total input of green, blue, and grey waters  
173 used for Texas beef cattle production. Forage and crop production yield (t/ha) and water  
174 use ( $m^3/ha$ ) efficiency affect the specific water demand ( $m^3/t$ ) of pasture and feedstuffs  
175 and depend upon the management practices of multiple beef cattle stakeholders:  
176 ranchers, landowners, hay suppliers, farmers, feed mills, and feedlots. Stakeholder  
177 management practices also alter the water demands for cooling, chemical mixing,  
178 cleaning, waste treatment, dust control, nutrient and drinking requirements, and animal



179 growth and performance (i.e., obtaining mature weight, size, and carcass quality; Fig 2:  
180 loops R1, R2, R3). The centralization and decentralization of the three major cattle  
181 production phases (i.e., cow-calf, stocker, and feedlot) across a wide range of climate  
182 and environmental conditions, sub-tropical to arid, create a disparity in water used at each  
183 phase and collectively between all phases; resulting from significant gaps in  
184 communication across the supply chain (Fig 2: loops R4, B1). Communication gaps  
185 include the lack of knowledge transfer of cattle water use levels as they progress across  
186 the supply chain.

187  
188 **Fig 2. The dynamic hypothesis causal loop diagram.** Blue arrows indicate linkages  
189 between variables and plus (+) and minus (-) signs denote variables relationship (i.e.,  
190 same or opposite directionality). Perpendicular lines on linkages indicate time delays for  
191 processes to occur between variables. The circular arrows indicate the direction of the  
192 feedback pathway (i.e., clockwise or counterclockwise) where the R is reinforcing and  
193 the B is balancing. Bolded wording indicates the name of each loop.

194  
195 Further, smaller operations tend to be more heterogeneous in management and  
196 water use efficiency but still account for a large proportion of total water use, while more  
197 extensive operations are mainly homogenous in terms of management. Therefore, the  
198 variation of the Texas beef cattle population, water use, existing resource availability,  
199 and limitations impact water allocation ( $m^3$ ), water cost (USD/ $m^3$ ), total meat production  
200 (kg), and marginal profitability (\$/kg meat; Fig 2: loop B2). Local, state, and federal  
201 agencies may incentivize or disincentivize beef cattle stakeholders' level of water use

202 efficiency for beef cattle operations as water scarcity or consumer perception change.  
203 Identification of actual water use and comparative advantage amongst Texas regions  
204 and feedstuff type/production efficiency [i.e., specific water use(m<sup>3</sup>/t crop or forage)]  
205 provides baseline TXWFB measurements for sustainable water use and helps to bridge  
206 communication gaps between major beef cattle production phases for high leverage,  
207 water-reducing, improvements. Providing a baseline TXWFB value to show current and  
208 marked improvement in beef water use may also relieve consumer's perception that  
209 consuming beef is unsustainable and harmful to the environment. Instead, TXWFB has  
210 the potential to indicate to consumers that areas dominated by grasslands and  
211 rangelands have the appropriate ecological capacity to produce beef and that  
212 alternatives such as increased grain crop production (lower-water costs) in lieu of beef  
213 may have unintended economic (decrease of US competitiveness) and environmental  
214 consequences (land and water degradation, the loss of nutrient cycling, wildlife/insect  
215 habitat and ecological goods and services).

## 216 **Model conceptualization**

217 A professional version of dynamic modeling software, Vensim DSS, was used to  
218 visualize three specific submodels in the form of CLD from the factors identified in the  
219 dynamic hypothesis statement. The conceptual submodels include (1) cattle population,  
220 (2) growth and nutrition, and (3) the livestock water footprint. The methods section  
221 references Figs 2-5 and uses panel A (the top half) to visualize the model structure. In  
222 the results section Figs with two panels (A and B) are describe independtly and together  
223 to convey the resulting behavior of each conceptual structure.

## 224 **Cattle population**

225           The production of beef cattle in the United States is segmented (cow-calf,  
226 stocker, and feedlot) and follow the same general pattern like many regions around the  
227 world (10), but specific intricacies exist among regions, even within the United States,  
228 that impact the  $WF_B$  (Fig 3). Cattle management decisions for reproduction, growth, and  
229 sales are influenced by available resources (i.e., time, finances, feed, water), and  
230 economics. Collectively, short and long-term decisions influence cattle populations  
231 throughout the cow-calf, stocker, and feedlot phases. First, the cow-calf phase (Fig 3A)  
232 serves as the primary reinforcing structure that ensures beef cattle will be available  
233 each year through the development of replacement heifers and maintenance of a  
234 mature cow herd (Fig 3A: loop R1 Breeding Population).

235   **Fig 3. The dynamic structure of the beef cattle population (A) and an example of**  
236 **oscillatory behavior from the structure of the cattle population system (B).** Blue  
237 arrows indicate linkages between variables and plus (+) and minus (-) signs denote  
238 variables relationship (i.e., same or opposite directionality). Perpendicular lines on  
239 linkages indicate time delays for processes to occur between variables. The circular  
240 arrows indicate the direction of the feedback pathway (i.e., clockwise or  
241 counterclockwise) where the R is reinforcing and the B is balancing. Bolded wording  
242 indicates the name of each loop.

243

244           Replacement heifers, after a two-year delay, will return to the mature cow herd  
245 and contribute to the next generation of progeny. This is a closed-loop system, meaning  
246 that the feedback exists between the number of calves born and the number of  
247 replacement animals available to sustain a commercially viable population.

248 Consequently, mature cows, calves, and replacement heifers within this feedback loop  
249 are consuming resources. Calves not selected for re-breeding (heifers or steers) enter  
250 the portion of the beef cattle supply chain that terminates at slaughter when a desired  
251 mature weight is obtained. The desired number of stocker and feedlot cattle reduce the  
252 calves that are available for rebreeding (Fig 3A: loops B1 Stocker Population; B2  
253 Feedlot Cattle Population). The duration of resource allocation to cattle varies greatly  
254 throughout the beef supply chain. For example, weaned calves may remain at the same  
255 ranch and region, or they may be sold and shipped to an entirely different region when  
256 entering a new phase (e.g., stocker or feedlot phases). Calves may also be sold directly  
257 to a feedlot phase and circumvent the stocker phase (i.e., Fig 3A; loop B3, Feedlot  
258 Calves). Within the cow-calf phase, some cattle fail to be productive and do not or  
259 cannot produce calves (Fig 3A: loops B4 Aging Out; B5 Unproductive Heifers) and are  
260 culled for meat production which decreases (balancing action) the total breeding  
261 population. Similar to the population loop in Fig 3A., stocker and feedlot cattle are  
262 consuming resources for different durations and at different water use intensities; some  
263 regions may have higher or lower water use intensities associated with forages, grains,  
264 and from climatic conditions. Overall, Fig 3A provides the fundamental structure of the  
265 primary reinforcing mechanism (R1: Breeding Population) and balancing mechanisms  
266 that sustain the beef cattle population and maintains a stable supply of beef for  
267 consumption. Similar structures have been used for hogs (22) and beef cattle (13,23).  
268 Conceptualization of this part of the problem, daily  $WF_B$  assessment, captures the  
269 importance of resource use duration and variation that exists within and across the beef  
270 cattle supply chain.

## 271 **Growth and nutrition**

272 Population dynamics (Fig 3A) drive the behavior of the system and influence the  
273 nutrition and growth dynamics within and across each major cattle production phase  
274 (Fig 4); cow-calf, stocker, feedlot (Fig 4A). Each phase contains a reinforcing feedback  
275 mechanism that influences weight (kg). Weight drives the amount of dry matter intake  
276 (DMI), which influences the rate of gain (kg/day). Suckling calves (not weaned)  
277 consume milk primarily and then shift to forage-based diets as they mature (Fig 3A: loop  
278 R1 Breeding Population, Fig 4A: loop R2 Calf Development) (24).

279

280 **Fig 4. The dynamic structure of cow-calf, stocker, and feedlot growth and**  
281 **nutrition and interlinkages across the supply chain (A) and an example of cattle**  
282 **growth (kg/day) behavior (B).** Where DMI means dry matter intake. Blue arrows  
283 indicate linkages between variables and plus (+) and minus (-) signs denote variables  
284 relationship (i.e., same or opposite directionality). Perpendicular lines on linkages  
285 indicate time delays for processes to occur between variables. The circular arrows  
286 indicate the direction of the feedback pathway (i.e., clockwise or counterclockwise)  
287 where the R is reinforcing and the B is balancing. Bolded wording indicates the name of  
288 each loop. The weaned calf and stocker weight (panel B) represent the entire stocker  
289 stage after weaning.

290

291 Maturity influences physiological and anatomical characteristics determining feed  
292 inputs and virtual water use. Upon weaning of suckling calves, cessation of milk  
293 production from cows (dams), the calves enter the stocker stage and consume primarily

294 forages. Forage quality and duration of the stocker phase influences the rate of growth  
295 and weight that stocker cattle will obtain during this phase (Fig 4A: loop R3 Stocker  
296 Development). Milk and forage inputs generally utilize less virtual water ( $m^3$ ) as the cow-  
297 calf and stocker phases obtain resources from pasture, grasslands, and rangelands.  
298 The majority of stocker cattle will progress to the feedlot where their diet is transitioned  
299 over a three-week period from forages (pasture or roughages) to a high concentrate-  
300 based ration; total mixed ration (**TMR**; Fig 4A: loop R4 Feedlot Development). High  
301 concentrate TMRs result in higher rates of weight (muscle and fat; kg/day) deposition  
302 during this period, known as the finishing phase. However, the water use associated  
303 with high concentrate diets [e.g., virtual water of grains ( $m^3/t$ )] is much higher than most  
304 pasture and rangeland inputs (25). Aside from diet type, environmental factors are very  
305 influential to cattle growth and performance regardless of the cattle phase. Extreme  
306 temperatures have been shown to influence the DMI of cattle, and this exogenous (non-  
307 feedback variable) has been described by Tedeschi and Fox (10) as the current  
308 effective temperature index (CETI). Although the actual equation is not described, the  
309 structure of the CETI equation is important as it is not an instantaneous calculation; it  
310 was developed to account for the impact of climate on animals over a period (usually 15  
311 days). The CETI captures the physical delay of heat accumulation and dissipation in  
312 cattle affecting the animal's daily DMI and drinking water intake. In complex systems,  
313 delays, such as the delay captured using the CETI, allows the hypothesized daily water  
314 footprint model structure to account for short and long-term environmental impacts on  
315 cattle nutrition. The cow-calf, stocker, and feedlot phases (Fig 4A: loops R2, R3, R4)  
316 share the same nutrition and growth structure, indicating that if the adequate quality of

317 nutrients is available and environmental conditions do not limit feed, then the cattle in  
318 each phase will continue to gain weight and increase DMI and their daily gain.  
319 Additionally, the three development loops (Fig 4A: loops R2; R3; R4) are connected  
320 between each phase as the animal progresses across the beef cattle supply chain (Fig  
321 4A). Interestingly, the growth and nutritional dynamics are managed at each production  
322 phase (i.e., independent). However, the stocker and feedlot phases are influenced by  
323 the initial weight of the cattle they are receiving, which impacts their nutritional  
324 requirements, potential growth, and the duration required to achieve desired weight to  
325 reach slaughter (i.e., dependent; supply chain dynamics). Ultimately feed, and growth  
326 dynamics affect daily cattle water use and the daily water footprint at each phase (cow-  
327 calf, stocker, feedlot) and aggregated water use across the beef cattle supply chain (Fig  
328 4A).

### 329 **Livestock water footprint**

330 The dry matter intake of the cattle population is the main driver of the cattle  
331 performances (weight gain) and also of the water footprint. The daily water footprint is  
332 an aggregation of drinking water and service water consumption (direct water use), and  
333 also of pasture, hay, supplementation, and concentrates (e.g., grains) water uses  
334 (virtual water) that represent the daily water use required to achieve cattle growth (26–  
335 28). In this study the virtual water of feeds is determined using the specific water  
336 demand ( $m^3/t$ ) approach calculates is the amount of water (green or blue;  $m^3/ha$ ; i.e.,  
337 evapotranspiration) used to produce a given amount of forage or grains ( $t/ha$ ) (27,29).  
338 The daily water footprint inputs are quantitatively dependent on the amount of feed  
339 intake and are connected to the growth and nutrition feedback dynamics for each cattle

340 phase (i.e., cow-calf, stocker, and feedlot, see growth and nutrition section above and  
341 Fig 4A). The daily water use (L/d) is then divided by the daily weight gain of boneless  
342 beef (kg/d) to obtain a daily water footprint (L/kg). Daily boneless beef is the percent of  
343 boneless beef of the live animal weight gain at a given physiological stage (i.e., young  
344 to mature; nutrient demands). The, daily water footprint, differs from the WFA for  
345 livestock in that the WFA only reports a  $WF_B$  at slaughter versus a continuous value  
346 reported by the TXWFB.

347         Determining the daily water footprint reflects the average for cattle in similar beef  
348 production supply chains. However, it does not reflect the total resource use or its  
349 impact. Assessing beef cattle resource use and impact requires that the average  $WF_B$   
350 be multiplied by the cattle population in a given region (Fig 5; Fig 5A). As the cattle  
351 population increases, so do the quantity of regional water use, and this reinforcing  
352 relationship is accelerated or slowed by the instantaneous daily  $WF_B$ . If the regional  
353 beef water use exceeds available water for livestock, then resources (e.g., drinking  
354 water, forages, and grain) may become scarce or exceed the operating budget to  
355 maintain profitability or, in extreme cases, cattle may die from lack of feed or water.  
356 Therefore, the cattle population (Fig 3A) receives a balancing feedback action until  
357 regional water levels are sufficient to sustain a given cattle population (Fig 5A: loop B6  
358 Water Scarcity). The balancing loop of Fig 5A points out the carrying capacity of the  
359 system which is represented by the water availability and the sustainability of this  
360 resource. The fast or exponential growth of the beef sector will generate high pressure  
361 on the regional water use, especially enhancing feed production and crop cultivations,  
362 with increasing demand for blue man-managed water. A region will probably support



363 further beef cattle population growth until the delayed, and unintended effect of water  
364 scarcity collapses the population. The dynamics of overshoots and collapses are well  
365 known in natural resource exploitation (30).

366

367 **Fig 5. The daily livestock water footprint CLD (A) and an example of preliminary**  
368 **TXWFB model simulation of overshoot and collapse behavior (B).** Blue arrows  
369 indicate linkages between variables and plus (+) and minus (-) signs denote variables  
370 relationship (i.e., same or opposite directionality). Perpendicular lines on linkages  
371 indicate time delays for processes to occur between variables. The circular arrows  
372 indicate the direction of the feedback pathway (i.e., clockwise or counterclockwise)  
373 where the R is reinforcing and the B is balancing. Bolded wording indicates the name of  
374 each loop. The daily cattle water consumption is a ratio between the daily cattle water  
375 use ( $m^3/d$ ) and the total available water for livestock ( $m^3$ ). The smoothed cow population  
376 is the averaged daily mature cow (cattle, not shown on-axis).

377

## 378 **Sensitivity analysis**

379 Upon completion of the population, growth and nutrition, and water footprint CLD  
380 the model was parameterized with coefficients and equations from the Ruminant  
381 Nutrition System (**RNS**) (10) and the Nutrient Requirements for Beef Cattle (31). This  
382 preliminary calibration was then used to perform preliminary behavioral tests and  
383 sensitivity analyses on critical components of the calibrated model. Behavior tests are  
384 the evaluation of simulation results of a variable of interest to identify its pattern of  
385 behavior over time (e.g., reinforcing, balancing, oscillation). Three behavior tests were

386 performed. The first test evaluated the behavior of the mature cow population by  
387 simulating the population submodel for ~8 years. The second test evaluated the typical  
388 behavior of the cattle growth and nutrition submodel across the cow-calf, stocker, and  
389 feedlot phases. The third test evaluated the mature cow population, regional water  
390 availability, and the proportion of daily cattle water consumption for ~18 years in a  
391 water-limited scenario. Sensitivity analysis is a quantitative and qualitative model test  
392 that indicates the amount of variation of a variable of interest (e.g., daily water footprint)  
393 from the alteration of a constant variable [e.g., total digestible nutrients (**TDN**)]. The first  
394 sensitivity analysis varied TDN values of forage (pasture and hay) and grains (i.e.,  
395 individual components that comprise the TMR). The second sensitivity analysis ran  
396 1000 simulations of the same TDN values as sensitivity test one ( $\pm 10\%$ ) impact on the  
397 daily  $WF_B$ . The third sensitivity analysis evaluated the daily  $WF_B$  by altering the daily dry  
398 matter (**DM**) forage production rates 25, 75, 100 (kg/ha/day) in each cattle phase to  
399 adjust the specific water demand (SWD;  $m^3/t$ ) of forages and varied the SWD of grain  
400 crops (corn = 30 to 1500, soybean = 1500 to 5000, and distillers grain = 0 to 1500  $m^3/t$ )  
401 (32). Collectively, the CLD, behavioral, and sensitivity methods provide preliminary  
402 results that support the overarching hypothesized dynamic structure required for the  
403 TXWFB to model a daily  $WF_B$ .

## 404 **Results and discussion**

405 The problem of the limitations of current WFA methodologies has been  
406 articulated in the introduction section, and steps one and two of the SD method were  
407 used to articulate the problem and form a dynamic hypothesis. The results of this study

408 include the major CLD diagrams, their associated behavior, and sensitivity to  
409 parameters changes of important variables that influence the  $WF_B$ .

## 410 **Causal loop structures and behaviors**

411 The cattle population CLD identified one dominant reinforcing loop of the Texas  
412 cattle population (Fig 3A: loop R1). Five unique balancing loops were identified that  
413 cause the cattle population to decrease (Fig 3A: loops B1-5). The preliminary simulation  
414 results of these six loops indicated that the Texas population has an oscillatory behavior  
415 (Fig 3B). When synchronized with cattle population dynamics, three reinforcing loops  
416 were identified for the cattle growth and nutrition CLD (Fig 4A) and resulted in the  
417 reinforcing growth behavior of cattle weight for each cattle phase (Fig 4B). The growth  
418 and nutrition dynamics directly influenced the water consumption of the beef supply  
419 chain and the regional resource use (Fig 5A). Further, the dynamic structure of the  
420 growth and nutrition CLD resulted in a positive linkage (i.e., if one increases or  
421 decreases the linked variable does so as well) between DMI and four daily virtual (i.e.,  
422 indirect) water uses (Fig 5A). Drinking and service water were the two direct water uses  
423 identified in the  $WF_B$  CLD (Fig 5A). The  $WF_B$  CLD resulted in the linkage of daily cattle  
424 weight (i.e., boneless beef) and total daily cattle water use, which represents the daily  
425 water footprint (Fig 5A). Regional water scarcity and population dynamics were also  
426 developed in the  $WF_B$  CLD and resulted in one balancing loop to account for cattle  
427 population carrying capacity (Fig 5A: loop B6 Water Scarcity). Preliminary simulation of  
428 the water scarcity loop was able to create overshoot and collapse behavior (Fig 5B).  
429 Preliminary simulation of these cattle growth and nutrition and water footprint dynamics

430 indicated that non-linear relationships and delays play a role in daily weight gain relative  
431 to the daily  $WF_B$  (Fig 6; Fig 6AB).

432

433 **Fig 6. Preliminary growth and nutrition sensitivity analysis.** The three scenarios include  
434 base (640 days; 21.3 months), 90% of total digestible nutrient values (**TDN**; 749 days; 24.9  
435 months), and 110% TDN nutrition (566 days; 18.6 months) impact on weight (A) and the daily  
436  $WF_B$  (B).

## 437 **Sensitivity analysis**

438 Initial sensitivity analyses were performed to evaluate changes in cattle live  
439 weight (kg/d) and the daily  $WF_B$  (L water/kg boneless beef). The first sensitivity analysis  
440 of TDN, three scenarios, indicated that the time required to reach the desired mature  
441 weight (589 kg live weight) and the daily  $WF_B$  were increased and decreased with 90%  
442 and 110% baseline TDN values, respectively (Fig 6AB). The second sensitivity analysis  
443 of TDN, 1000 scenarios, showed that the feedlot stage had the most extensive daily  
444  $WF_B$  variability compared to the cow-calf and stocker stages (Fig 7; Fig 7A). The results  
445 of the third sensitivity analysis of forage and crop SWD indicated that production  
446 efficiency had a major impact on the daily  $WF_B$  across all beef cattle phases and that  
447 the daily  $WF_B$  can be higher in cow-calf or stocker phases and lower in the feedlot  
448 phase in some circumstances (Fig 7B).

449

450 **Fig 7. Preliminary sensitivity analysis.** Preliminary sensitivity analysis of  $\pm 10\%$  of TDN  
451 for forages and grains across all beef cattle phases (i.e., cow-calf, stocker, feedlot) on the daily  
452 water footprint (L water/kg boneless beef; A). Preliminary sensitivity analysis of annual dry

453 matter forage production, low (6,838 kg/ha), medium (20,510 kg/ha) to high (27,350 kg/ha) on  
454 the daily beef water footprint (L water/kg boneless beef; WF) and SWD of grains (B). Yellow,  
455 green, blue, and grey colors represent the percent of simulated water footprint values  
456 within given ranges.

457

## 458 **Discussion of the dynamic framework**

459 The SD methodology was successfully employed and contextualized existing  
460 WFA methods into a dynamic conceptual framework. The hypothesized structure from  
461 the dynamic hypothesis led to the conceptualization and preliminary behavioral and  
462 sensitivity analysis of cattle population, growth and nutrition, and water footprint  
463 dynamics. The population model produced the oscillatory behavior seen in other  
464 existing animal population models (Fig 3B) (20,30,33). The behavior of the growth and  
465 nutrition models was also as expected to show an increase in weight-dependent upon  
466 nutrient quality, environment, and management (Figs 3A and 5A) (10,31,34,35).  
467 Similarly, behavioral tests of the daily  $WF_B$  produced the expected increase of  $WF_B$   
468 levels as the time required to reach slaughter was prolonged, especially in the feedlot  
469 stage (Figs 3A and 5A), and these behaviors have been identified by Mekkonen and  
470 Hoekstra in 2012 (36). A combination of the cattle population and the daily cattle water  
471 use relative to regionally available water, in a water-limited scenario, resulted in the  
472 expected overshoot and collapse behavior. The overshoot and collapse behavior is a  
473 harsh system response that reflects unsustainable cattle population growth and large  
474 fluctuations in beef production and price (i.e., supply and demand). Sterman (20) gives  
475 examples of overshoot and collapse in dynamic models and their market and business

476 strategy implications. Understanding and avoiding this pitfall is critical for beef cattle  
477 stakeholders as livestock water use limitations, and pressure for more sustainable beef  
478 production grow. Behavioral results increased the confidence that the  $WF_B$  framework  
479 was adequate for livestock WFA and identified the long-term behavior types (e.g.,  
480 oscillation, exponential growth/decay) of cattle population, growth and nutrition, and  
481  $WF_B$  within this system.

482 Agreement of CLD behavior with existing models and publications led to the  
483 sensitivity analysis of critical constant parameters that were thought to be influential to  
484 several variables of interest, the daily  $WF_B$ , cattle population, livestock water availability,  
485 and cattle weight. Sensitivity analysis of TDN revealed expected sensitivity that cattle  
486 weight and daily  $WF_B$  are generally lower when TDN is low, which is consistent with  
487 ruminant nutrition and growth principles (Fig 6AB) (31). However, increased simulations  
488 (1,000) revealed that TDN had the most significant impact at the feedlot stage from  
489 TMRs with high concentrate diets, and these results are reasonable as cattle put on a  
490 substantial proportion of their weight and increase DMI during this phase. This aligns  
491 well with existing  $WF_B$  WFA that emphasizes the large water cost of feedlots (see  
492 studies mentioned in the introduction section above). Interestingly, the sensitivity  
493 analysis of forage and crop SWD revealed that the feedlot stage might have a lower  
494 daily  $WF_B$  than the cow-calf or stocker stages (Fig 7AB). Ambiguity exists for SWD  
495 values as pasture and hay (forage) growth, even within a region, depends on the  
496 climate, management of stocking rates, and soil fertility of the land. Thus, the  
497 improvement of forage water use efficiencies is likely a high-leverage solution to  
498 improve the  $WF_B$ , and this should be investigated. Furthermore, the estimation of SWD

499 values for crops is even more confusing than forage production. The current WFA  
500 method assesses high-resolution spatial areas to determine the SWD of grain crops in  
501 the same region as the cattle. However, in Texas, feed resources are procured from  
502 domestic (United States) and international sources, i.e., it is unlikely that grains  
503 consumed by cattle came from the same region. Therefore, the sensitivity analysis of  
504 grain crop SWD (e.g., corn and soybeans) that accounts for national SWD variation  
505 provides a more robust analysis of actual green and blue virtual water uses and their  
506 impact on the daily  $WF_B$ .

### 507 **Sustainability of production phases**

508 Often highly connected production supply chains lack communication between  
509 phases or segments that cause unintended consequences that are delayed in time,  
510 making it challenging to identify the root cause of a problem (e.g.,  $WF_B$ ). The dynamic  
511 framework in the current study provides a means for dialogue about the identified  
512 causal feedback mechanisms and delays that drive the  $WF_B$  within and across the cow-  
513 calf, stocker, and feedlot phases. For example, Fig 8, couples the existing feedback  
514 structures in this system and extends them to potential considerations for sustainability,  
515 production efficiency, marketing of beef products, and consumer consensus as the  
516 public becomes more aware of livestock water use intensities and the associated levels  
517 of sustainability. The balancing loop of the water scarcity embodies the sustainability of  
518 the beef sector connected to resource uses (Figs 4A: loop B6). A primary goal should  
519 be to keep the daily water footprint of beef production as low as possible. Increases in  
520 the daily water footprint of the agricultural sectors will decrease the regional water

521 availability, depress the growth of food production, and water use efficiency (Fig 8: loop  
522 R6 Cattle Growth).

523

524 **Fig 8. Causal loop diagram of the critical dynamic structure (described in results)**  
525 **and the anticipated feedback structure of public perception, marketing, and**  
526 **efficiency on the long-term beef water footprint of the beef livestock supply chain.**

527

528 It will also reduce the food supply as a direct consequence. One of the most  
529 powerful leverage points to reach high sustainability levels could be to reduce the daily  
530 water footprint and keep increasing production efficiency (37). Improving efficiency will  
531 increase cattle weight per unit of consumed water, or reduce the daily water use, ending  
532 in a lower daily water footprint. Additionally, improvements in efficiency will allow water  
533 resources to be spared and provide greater availability of regional water, which will  
534 make the beef sector grow (Fig 8: loop B7 Resource Scarcity). As a positive side effect,  
535 the lower environmental impact of the  $WF_B$  might increase consumer consensus for the  
536 beef sector and the willingness to pay for environmentally friendly products. Increased  
537 sales from environmentally friendly beef products will keep the pressure to continue to  
538 improve cattle production efficiency for low impact beef (Fig 8: loop R7 Beef Marketing).  
539 Being that resource scarcity is the only balancing loop of the system, the local and  
540 regional water availability and water scarcity determine the potential level of  
541 sustainability that a given area can reach (due to its internal carrying capacity). Using  
542 the Life Cycle Assessment approach, Ridoutt and Pfister (38) developed an adjustment  
543 factor that, in addition to the livestock water footprint estimate, allows the water footprint



544 to be scaled to local conditions concerning a water scarcity index (Water Stress Index).  
545 The water stress index considers the local availability of the water resource, indicating  
546 the quantity of water used that is potentially removed from other activities. The  
547 application of this index means that the same production process could have a greater  
548 impact if carried out in conditions of scarce water availability in respect to areas with  
549 water abundance. Aside from regional considerations, the  $WF_B$  sustainability and  
550 consumer willingness to purchase beef include the slaughter and meat fabrication,  
551 retail, and household segments which were not included in this study. This proposed  
552 dynamic structure should be extended to these beef cattle segments to complete the full  
553 span of beef cattle water use and further identify specific leverage points for  
554 improvements in sustainability,  $WF_B$  levels, and more explicit determination of water  
555 uses. Thus, the question arises from this  $WF_B$  dynamic framework of how to capture  
556 specific water uses of the  $WF_B$  from cattle producers, meat processors, retailers, and  
557 consumers to understand meaningful long-term feedback relationships, delays, and the  
558 potential consequences.

## 559 **Conclusions**

560 In conclusion, improved  $WF_B$  assessment is essential to achieve long-term  
561 improvements in livestock water use within and across the beef cattle supply chain. This  
562 study developed a dynamic framework to advance current WFA methods. The  
563 preliminary behavioral and sensitivity evaluations indicated that the framework is  
564 suitable to formulate the water footprint model for Texas with critical ruminant nutrition  
565 and growth equations using dynamic modeling software. A dynamic daily  $WF_B$  is likely  
566 to begin to resolve issues amongst existing WFA methodologies as it more accurately

567 represents the dynamic nature of daily and total livestock water use. The CLD and their  
568 descriptions are essential and necessary to understand the complexity of the underlying  
569 structure and dominant loops that drive the long-term behavior of this system. Overall,  
570 freshwater challenges in agriculture livestock systems may be resolved by using this  
571 preliminary TXWFB framework to enhance the current livestock water footprint and  
572 supply chain assessment methods and quantify regional beef sustainability. Moreover,  
573 this study provides a new perspective for understanding the necessity for improved  
574 dialogue about  $WF_B$  sustainability within and across the beef cattle industry.

575

## 576 **Acknowledgments**

577 We want to acknowledge the partial financial support by the 2017 Mini-Grant  
578 Opportunities to Enhance Teaching, Research, and Extension Capacity in the  
579 Department of Animal Science, and by the NIFA Hatch funding #TEX09123  
580 Development of Mathematical Nutrition Models to Assist with Smart Farming  
581 Sustainable Production.

## 582 **References**

- 583 1. Hoekstra AY, Mekonnen MM. The water footprint of humanity. *Proc Natl Acad Sci*  
584 U S A. 2012;109(9):3232–7.
- 585 2. Legesse G, Ominski KH, Beauchemin KA, Pfister S, Martel M, McGeough EJ, et  
586 al. BOARD-invited review: Quantifying water use in ruminant production. *J Anim*  
587 *Sci.* 2017;95(5):2001–18.
- 588 3. Hoekstra, A.Y., Hung PQ. Virtual water trade. A quantification of virtual water  
589 flows between nations in relation to international crop trade [Internet]. Delft,  
590 Netherlands; 2002. Available from: <http://www.ayhoekstra.nl/pubs/Report11.pdf>
- 591 4. Falkenmark M. Land–water linkages: A synopsis. Land and water integration and  
592 river basin management. Rome, Italy; 1995.
- 593 5. Boulay AM, Bare J, Benini L, Berger M, Lathuillière MJ, Manzardo A, et al. The  
594 WULCA consensus characterization model for water scarcity footprints: assessing  
595 impacts of water consumption based on available water remaining (AWARE). *Int J*  
596 *Life Cycle Assess.* 2018;23(2):368–78.
- 597 6. Food and Agriculture Organization. Guidelines for Assessment-Water Use in  
598 Livestock Production Systems and Supply Chains. [Internet]. 2019 [cited 2019  
599 Sep 1]. Available from: <http://www.fao.org/3/ca5685en/ca5685en.pdf>
- 600 7. Tedeschi LO, Muir JP, Riley DG, Fox DG. The role of ruminant animals in  
601 sustainable livestock intensification programs. *Int J Sustain Dev World Ecol*  
602 [Internet]. 2015;22(5):452–65. Available from:  
603 <http://dx.doi.org/10.1080/13504509.2015.1075441>
- 604 8. Tedeschi LO, Almeida AK De, Atzori AS, Pierre J, Fonseca MA, Cannas A.

- 605 Revista Brasileira de Zootecnia Invited Review A glimpse of the future in animal  
606 nutrition science . 1 . Past and future challenges. 2017;
- 607 9. Tedeschi LO, Fonseca MA, Muir JP, Poppi DP, Carstens GE, Angerer JP, et al. A  
608 glimpse of the future in animal nutrition science. 2. Current and future solutions.  
609 Rev Bras Zootec. 2017;46(5):452–69.
- 610 10. Tedeschi LO, Fox DG. The Ruminant Nutrition System: An Applied Model for  
611 Predicting Nutrient Requirements and Feed Utilization in Ruminants. 2nd ed.  
612 Tedeschi LO, Fox DG, editors. Acton, Massachusetts: XanEdu; 2018.
- 613 11. Turner BL, Ph D, Members T, Roger D, Wuellner M, Nichols T, et al. A system  
614 dynamics model for understanding agricultural land use change in the north  
615 central United States : III . Forecasting economic , policy or cultural scenarios  
616 from 2012 to 2062 Grassland conversion in the Northern Great Plains. 2016;
- 617 12. Tedeschi LO, Fox DG, Guiroy PJ. A decision support system to improve individual  
618 cattle management. 1. A mechanistic, dynamic model for animal growth. Agric  
619 Syst. 2004;
- 620 13. Turner BL, Rhoades RD, Tedeschi LO, Hanagriff RD, McCuistion KC, Dunn BH.  
621 Analyzing ranch profitability from varying cow sales and heifer replacement rates  
622 for beef cow-calf production using system dynamics. Agric Syst [Internet].  
623 2013;114:6–14. Available from: <http://dx.doi.org/10.1016/j.agsy.2012.07.009>
- 624 14. Menendez HM, Wuellner MR, Turner BL, Gates RN, Dunn BH, Tedeschi LO. A  
625 spatial landscape scale approach for estimating erosion, water quantity, and  
626 quality in response to South Dakota grassland conversion. Nat Resour Model  
627 [Internet]. 2020 Oct 8 [cited 2019 Oct 9];33(1):e12243. Available from:

- 628 <https://onlinelibrary.wiley.com/doi/abs/10.1111/nrm.12243>
- 629 15. Tinsley TL, Chumbley S, Mathis C, Machen R, Turner BL. Managing cow herd  
630 dynamics in environments of limited forage productivity and livestock marketing  
631 channels: An application to semi-arid Pacific island beef production using system  
632 dynamics. *Agric Syst.* 2019;
- 633 16. Tedeschi LO, Fox DG, Kononoff PJ. A dynamic model to predict fat and protein  
634 fluxes and dry matter intake associated with body reserve changes in cattle. *J*  
635 *Dairy Sci.* 2013;96(4):2448–63.
- 636 17. Lie H, Rich K. Modeling dynamic processes in smallholder dairy value chains in  
637 nicaragua: A system dynamics approach. *Int J Food Syst Dyn.* 2016;7:328–40.
- 638 18. Molina BRA, Guerrero HS, Gaona RC, Atzori AS, Morales JD. Dynamic  
639 estimation of greenhouse gas emissions from bovine livestock of Valle del Cauca.  
640 *Colomb Acta Agron.* 2017;66:422–8.
- 641 19. McBride WD, Mathews K. United States Department of Agriculture The Diverse  
642 Structure and Organization of U.S. Beef Cow-Calf Farms [Internet]. 2011.  
643 Available from: <https://www.ers.usda.gov/publications/pub-details/?pubid=44532>
- 644 20. Sterman JD. *Business Dynamics: Systems Thinking and Modeling for a Complex*  
645 *World.* Boston, Massachusetts: McGraw-Hill Companies Incorporated; 2000.
- 646 21. Forrester JW. *Industrial dynamics.* Waltham, Massachusetts: Pegasus  
647 Communications; 1961.
- 648 22. Meadows DL. *Dynamics of Commodity Production Cycles.* Cambridge,  
649 Massachusetts: Wright-Allen Press; 1970.
- 650 23. Conrad SH. *The Dynamics of Agricultural Commodities and Their Responses to*

- 651 Disruptions of Considerable Magnitude. Proc 22nd Int Conf Syst Dyn Soc.  
652 2004;1–15.
- 653 24. Tedeschi LO, Fox DG. Predicting milk and forage intake of nursing calves. J Anim  
654 Sci. 2009;87(10):3380–91.
- 655 25. Palhares JCP, Morelli M, Junior CC. Impact of roughage-concentrate ratio on the  
656 water footprints of beef feedlots. Agric Syst [Internet]. 2017;155(April):126–35.  
657 Available from: <http://dx.doi.org/10.1016/j.agsy.2017.04.009>
- 658 26. Atzori AS, Canalis C, Francesconi AHD, Pulina G. A Preliminary Study on a New  
659 Approach to Estimate Water Resource Allocation: The Net Water Footprint  
660 Applied to Animal Products. Agric Agric Sci Procedia. 2016;8:50–7.
- 661 27. Mekonnen MM, Neale CMU, Ray C, Erickson GE, Hoekstra AY. Water  
662 productivity in meat and milk production in the US from 1960 to 2016. Environ Int.  
663 2019;
- 664 28. Flach, Ran R, Godar J, Karlberg L, Suavet C. Towards more spatially explicit  
665 assessments of virtual water flows: linking local water use and scarcity to global  
666 demand of brazilian farming commodities. Environ Res Lett. 2016;11:075003.
- 667 29. Mekonnen, M., Hoekstra, A.Y. National water footprint accounts: The green, blue  
668 and grey water footprint of production and consumptio [Internet]. Delft,  
669 Netherlands; 2011. Available from:  
670 [https://research.utwente.nl/en/publications/national-water-footprint-accounts-the-](https://research.utwente.nl/en/publications/national-water-footprint-accounts-the-green-blue-and-grey-water-f)  
671 [green-blue-and-grey-water-f](https://research.utwente.nl/en/publications/national-water-footprint-accounts-the-green-blue-and-grey-water-f)
- 672 30. Ford A. Modeling the Environment: An Introduction to System Dynamics Models  
673 of Environmental Systems. 2nd ed. Ford A, editor. Washington, DC: Island Press;

- 674 2010.
- 675 31. National Academies of Science Engineering and Medicine. Nutrient Requirements  
676 of Beef Cattle. 8th ed. Washington, DC: The National Academies Press; 2016.
- 677 32. Xu H, Wu M. A first estimation of county-based greenwater availability and its  
678 implications for agriculture and bioenergy production in the United States. *Water*.  
679 2018;10(2).
- 680 33. Grant, W. E., Pedersen, E. K., Marin, S. L. Ecology and Natural Resource  
681 Management: Systems Analysis and Simulation. New York, New York: John  
682 Wiley & Sons; 1997. 305–324 p.
- 683 34. Herring AD. Beef cattle production systems. Oxfordshire, United Kingdom: CAB  
684 International; 2014.
- 685 35. Ball DM, Hoveland CS, Lacefield GD. Southern forages: Modern concepts for  
686 forage crop management. 4th ed. Norcross, Georgia: Potash & phosphate institute  
687 and the foundation for agronomic research; 2007.
- 688 36. Mekonnen MM, Hoekstra AY. A Global Assessment of the Water Footprint of  
689 Farm Animal Products. *Ecosystems*. 2012;15(3):401–15.
- 690 37. Capper JL. The environmental impact of beef production in the united states:  
691 1977 compared with 2007. *J Anim Sci*. 2011;89:4249–61.
- 692 38. Ridoutt BG, Pfister S. A new water footprint calculation method integrating  
693 consumptive and degradative water use into a single stand-alone weighted  
694 indicator. *Int J Life Cycle Assess*. 2013;18(1):204–7.

695

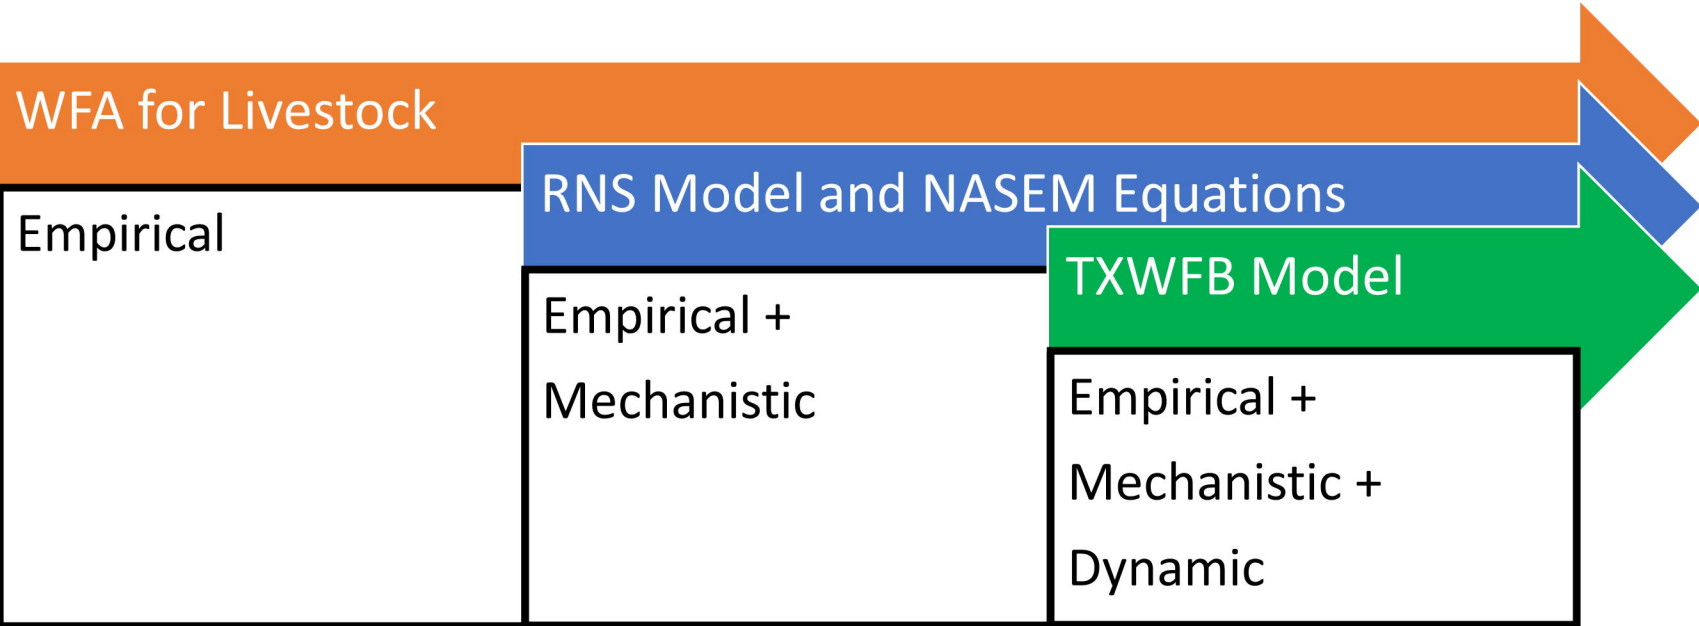



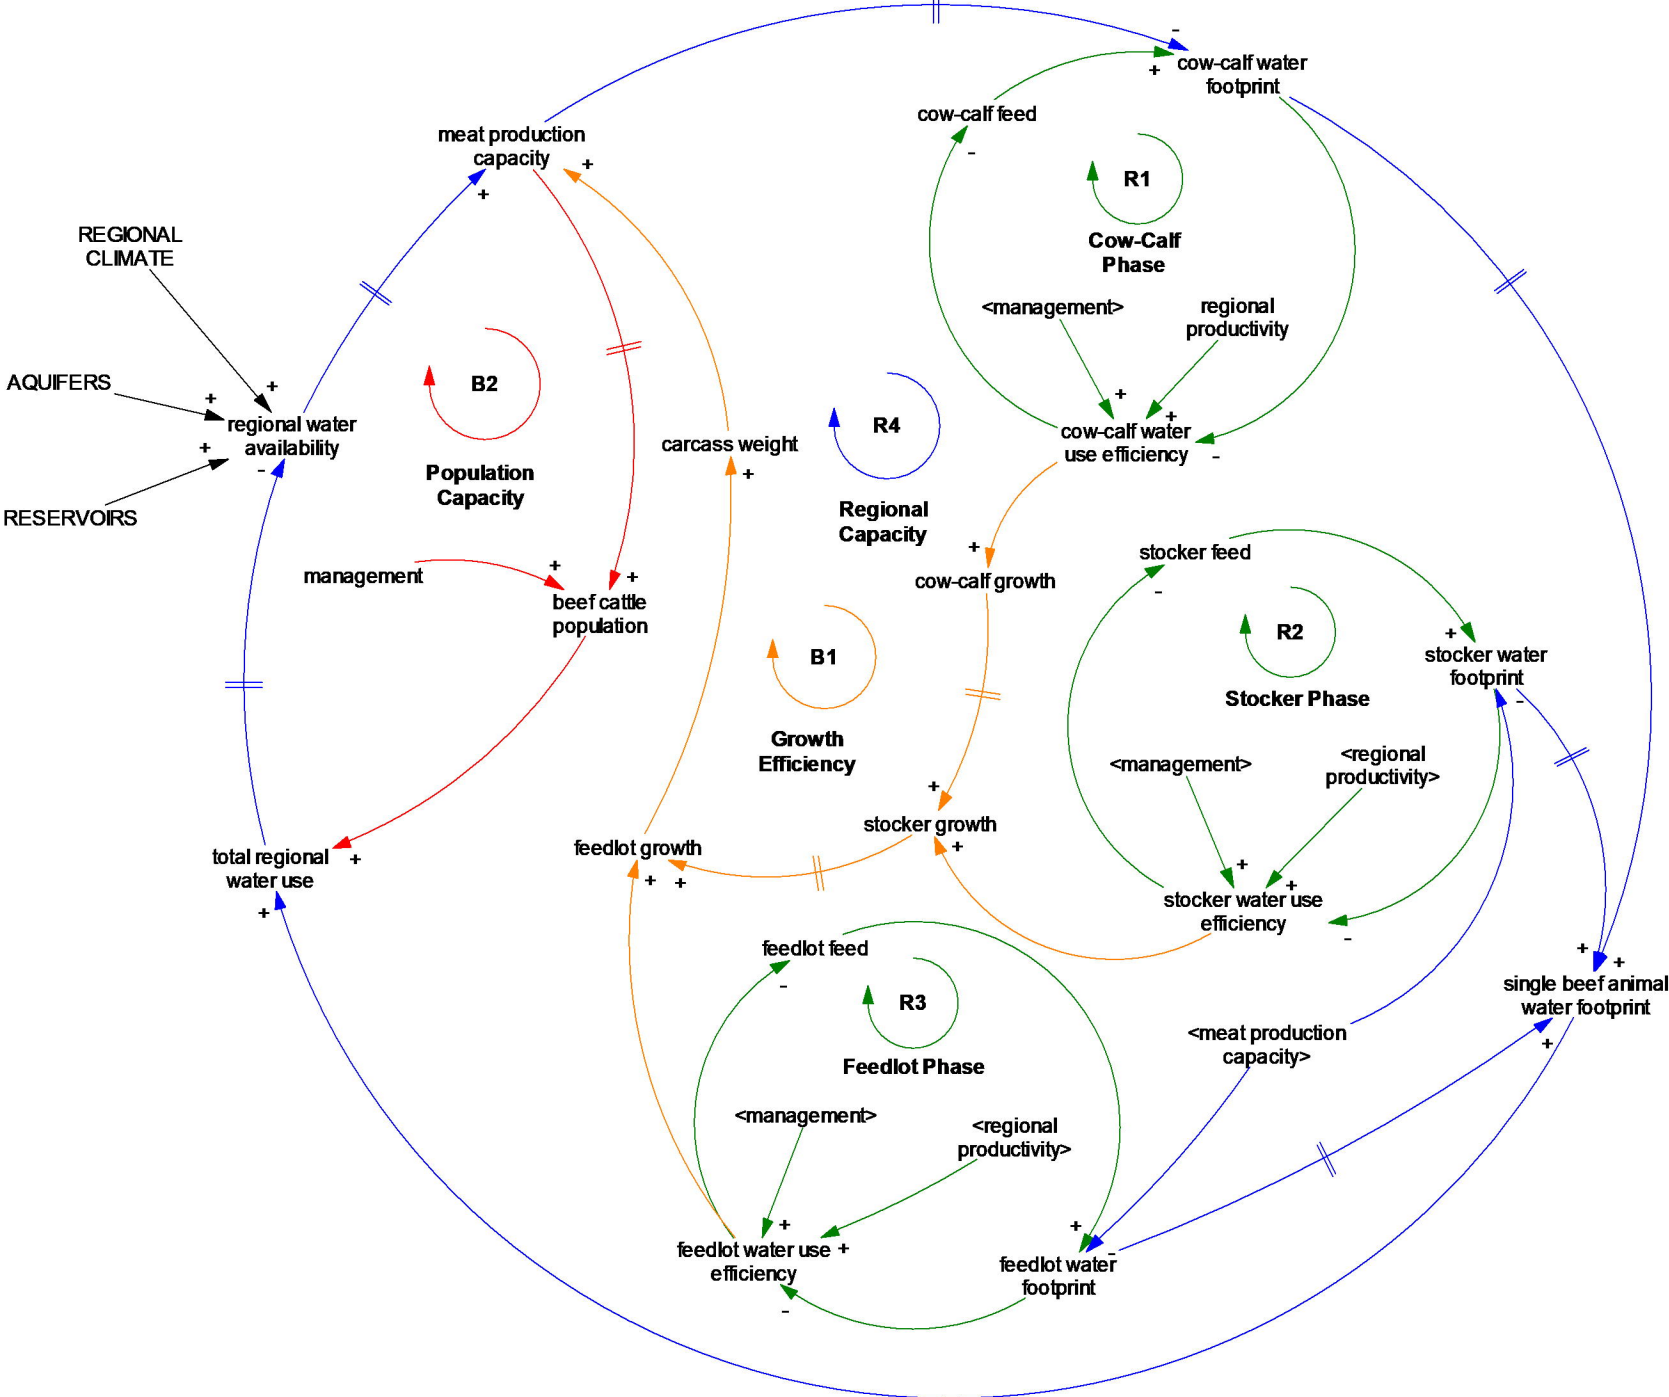

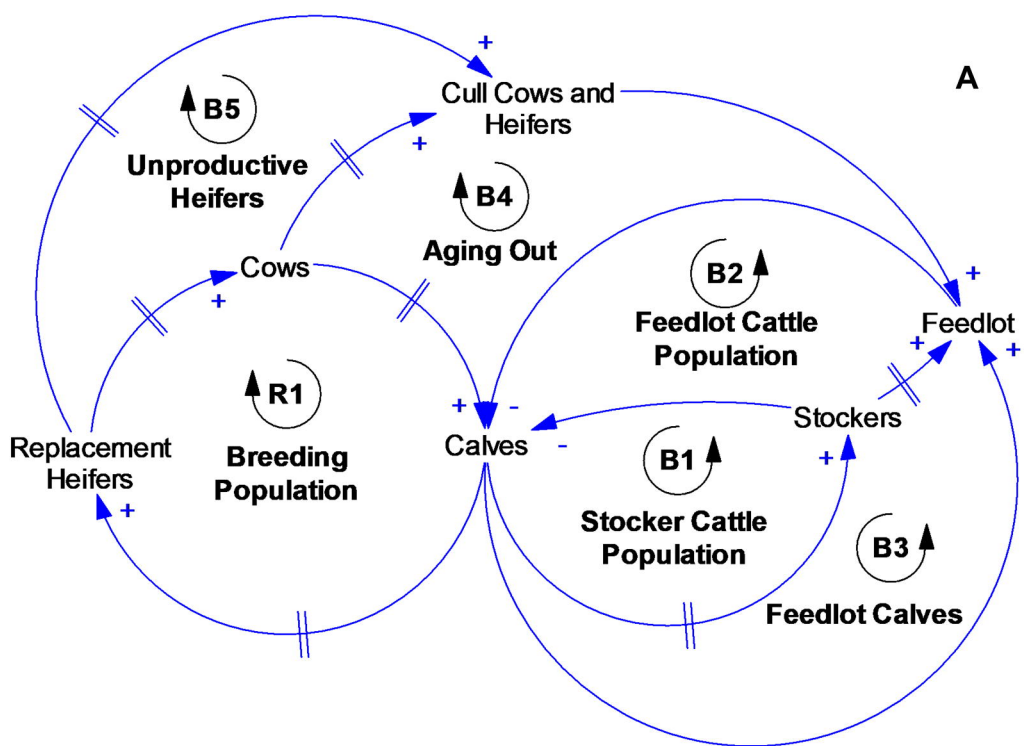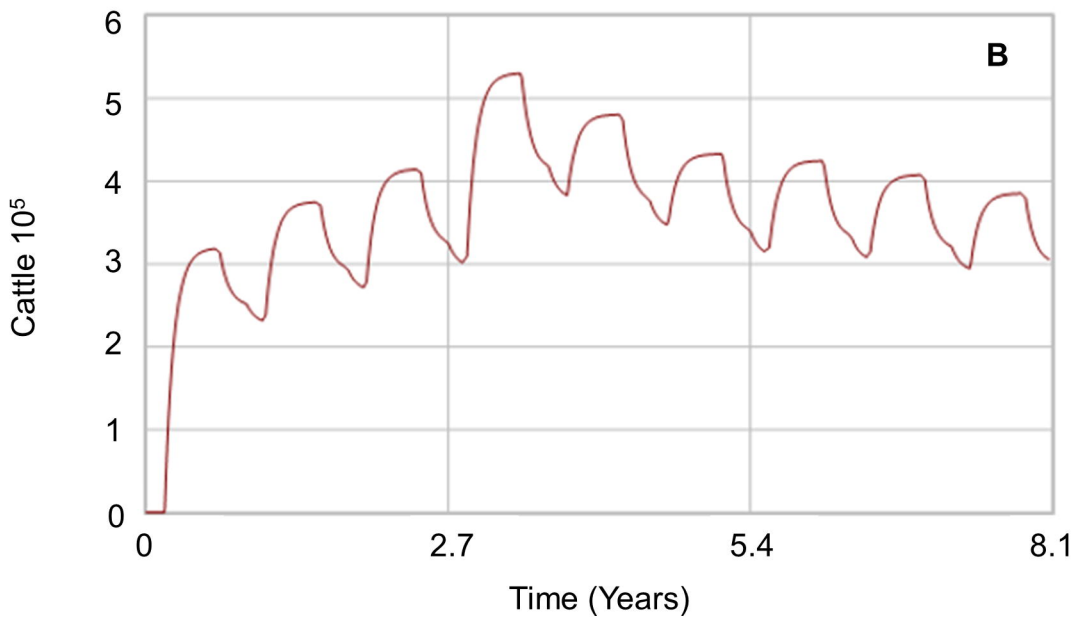

— Cow Population

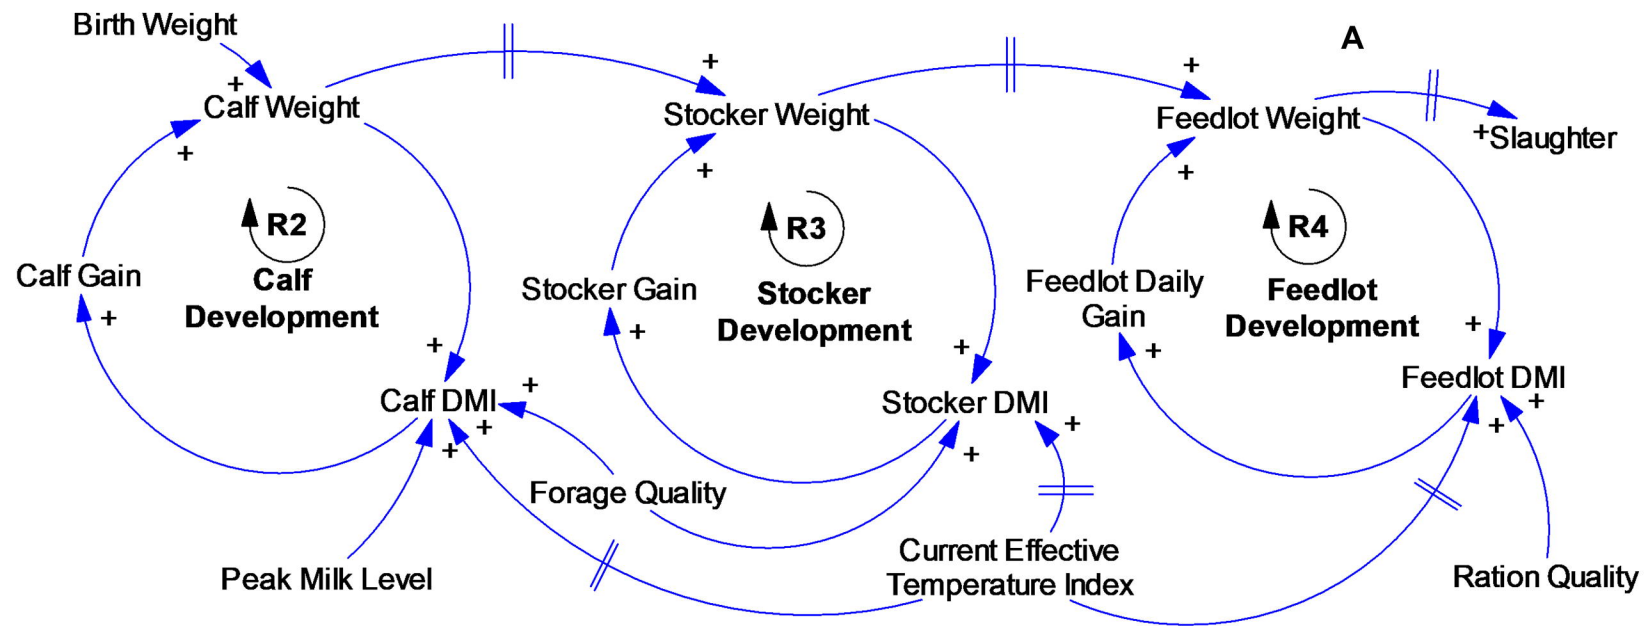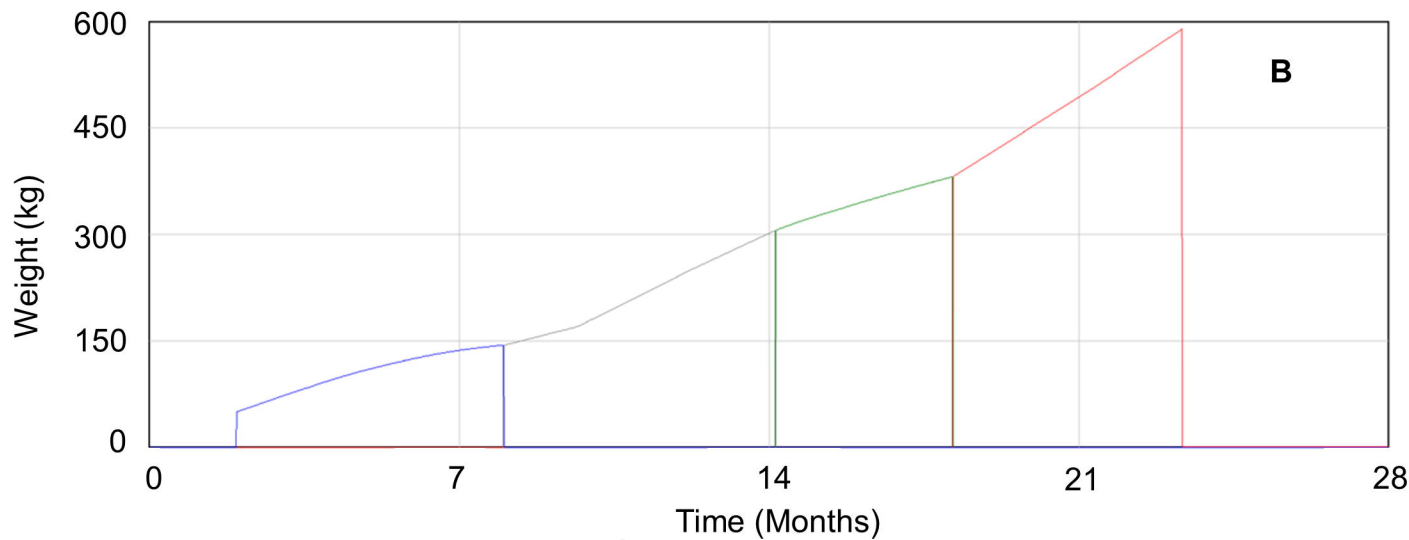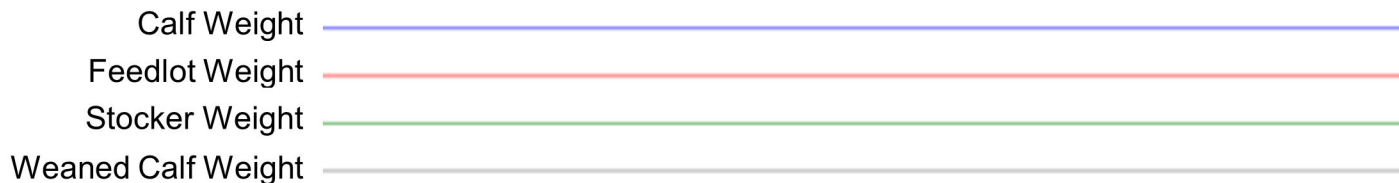

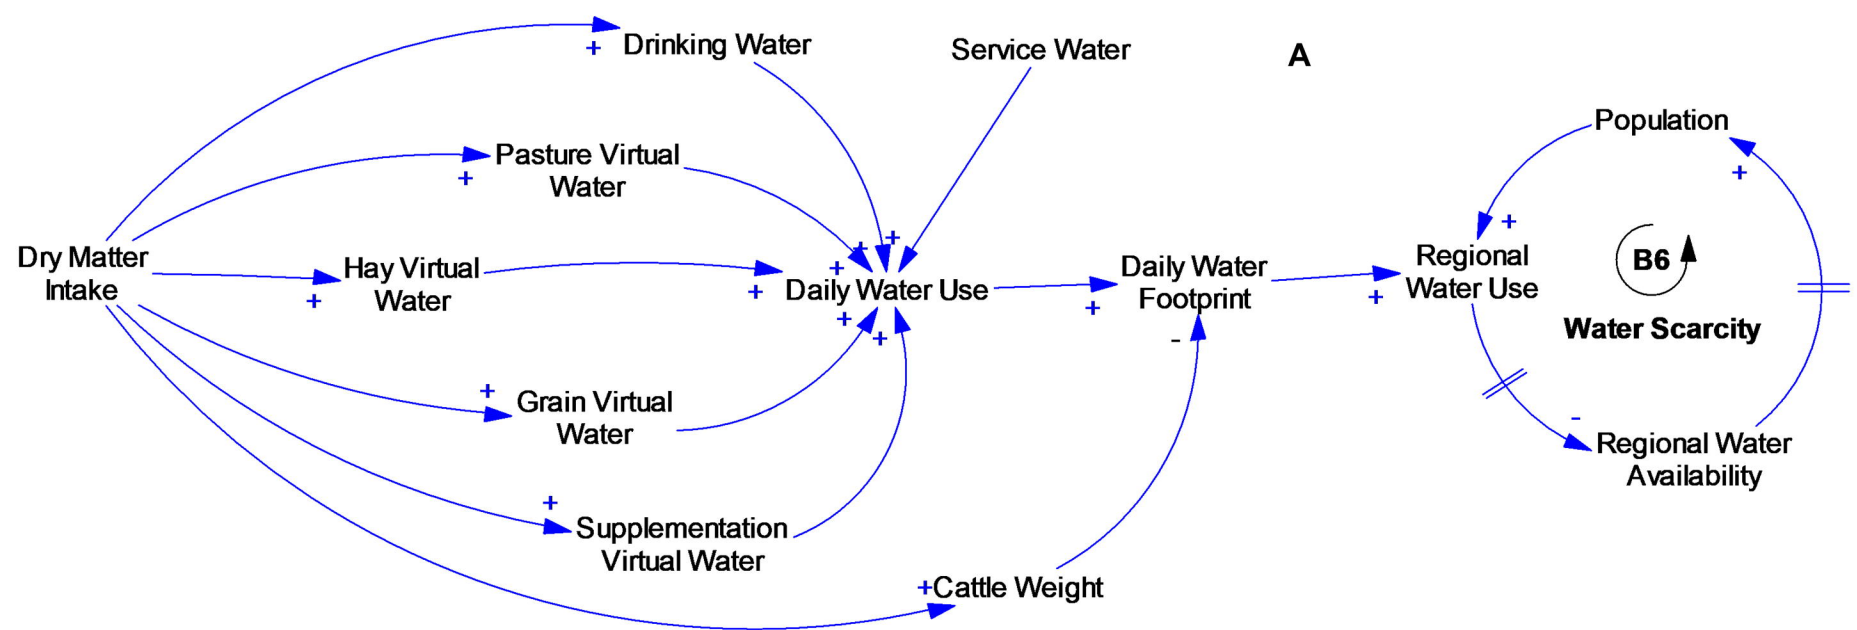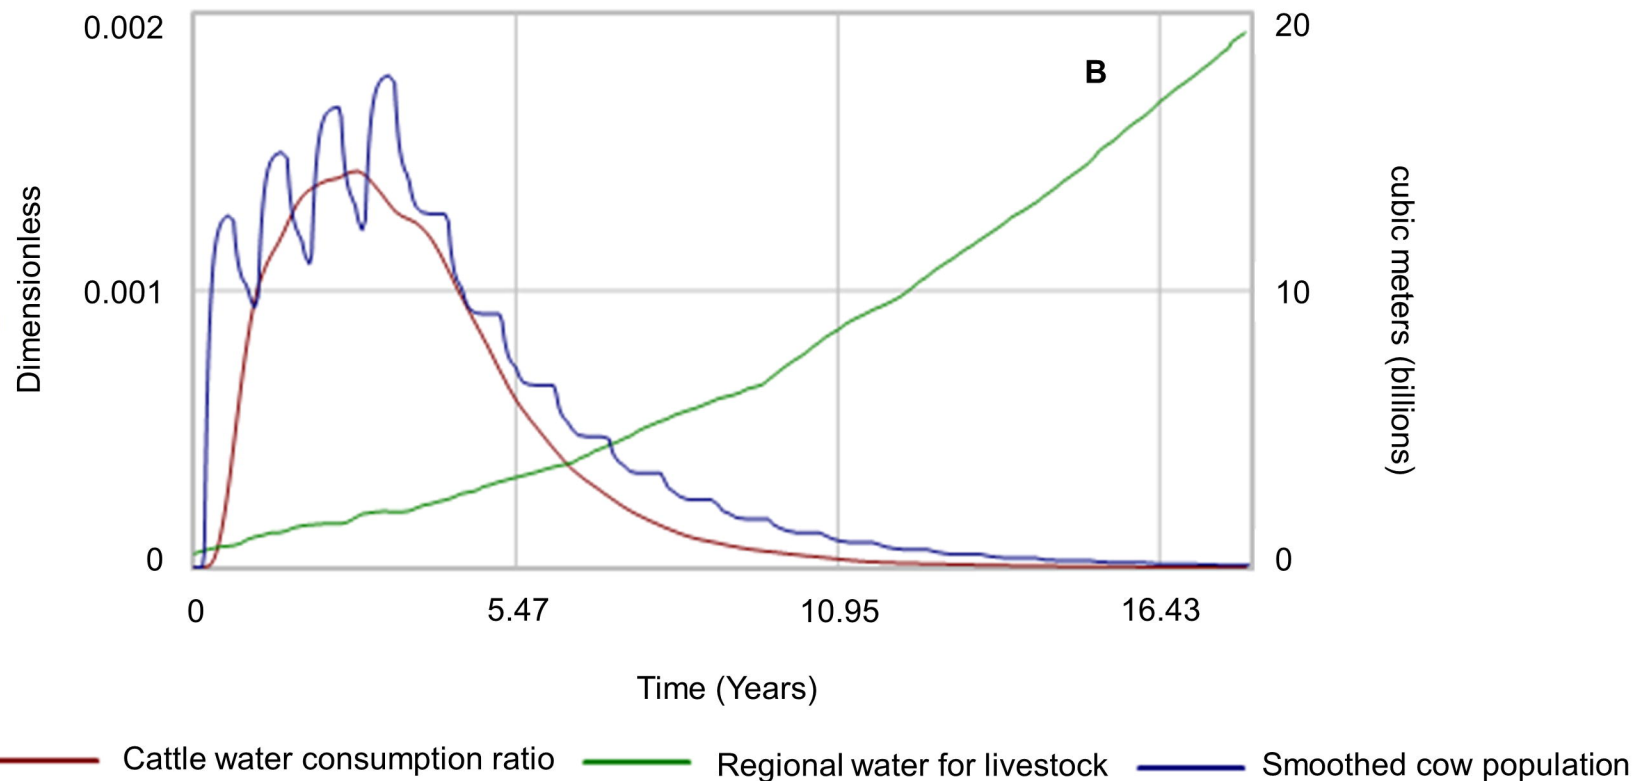

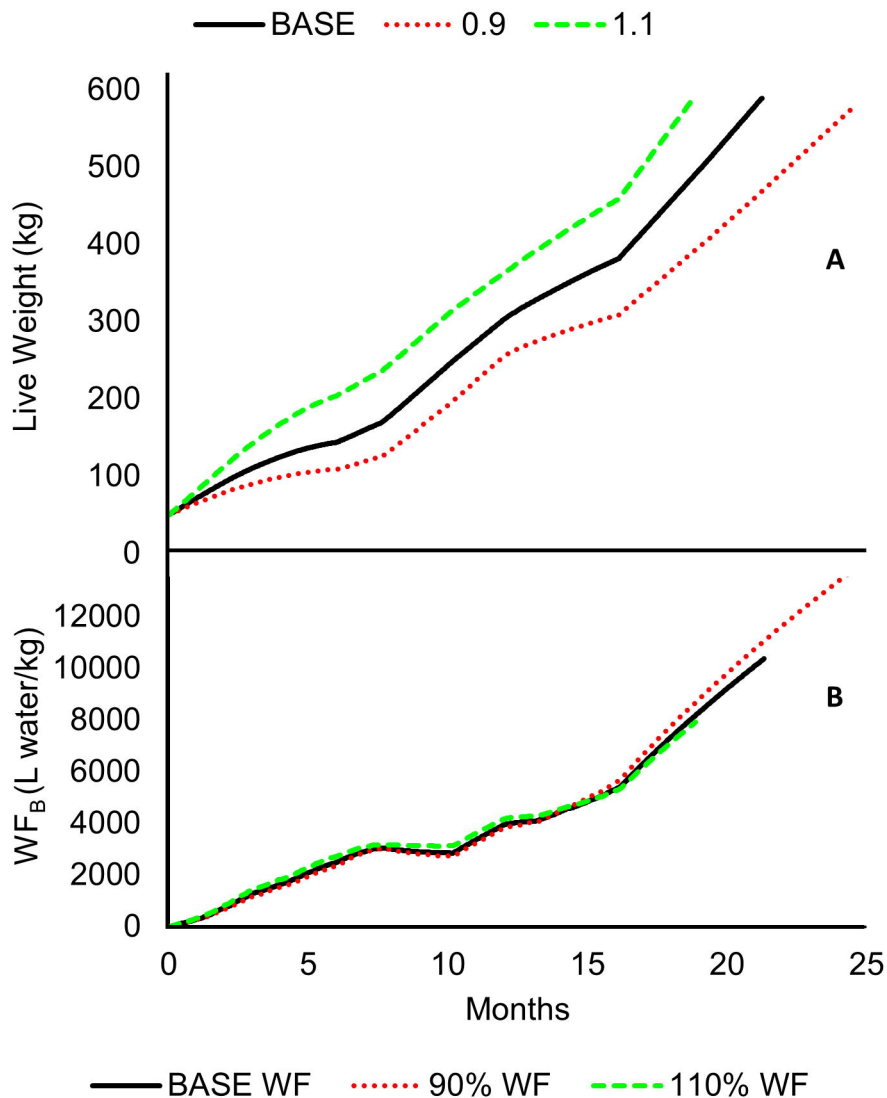

50% 75% 95% 100%

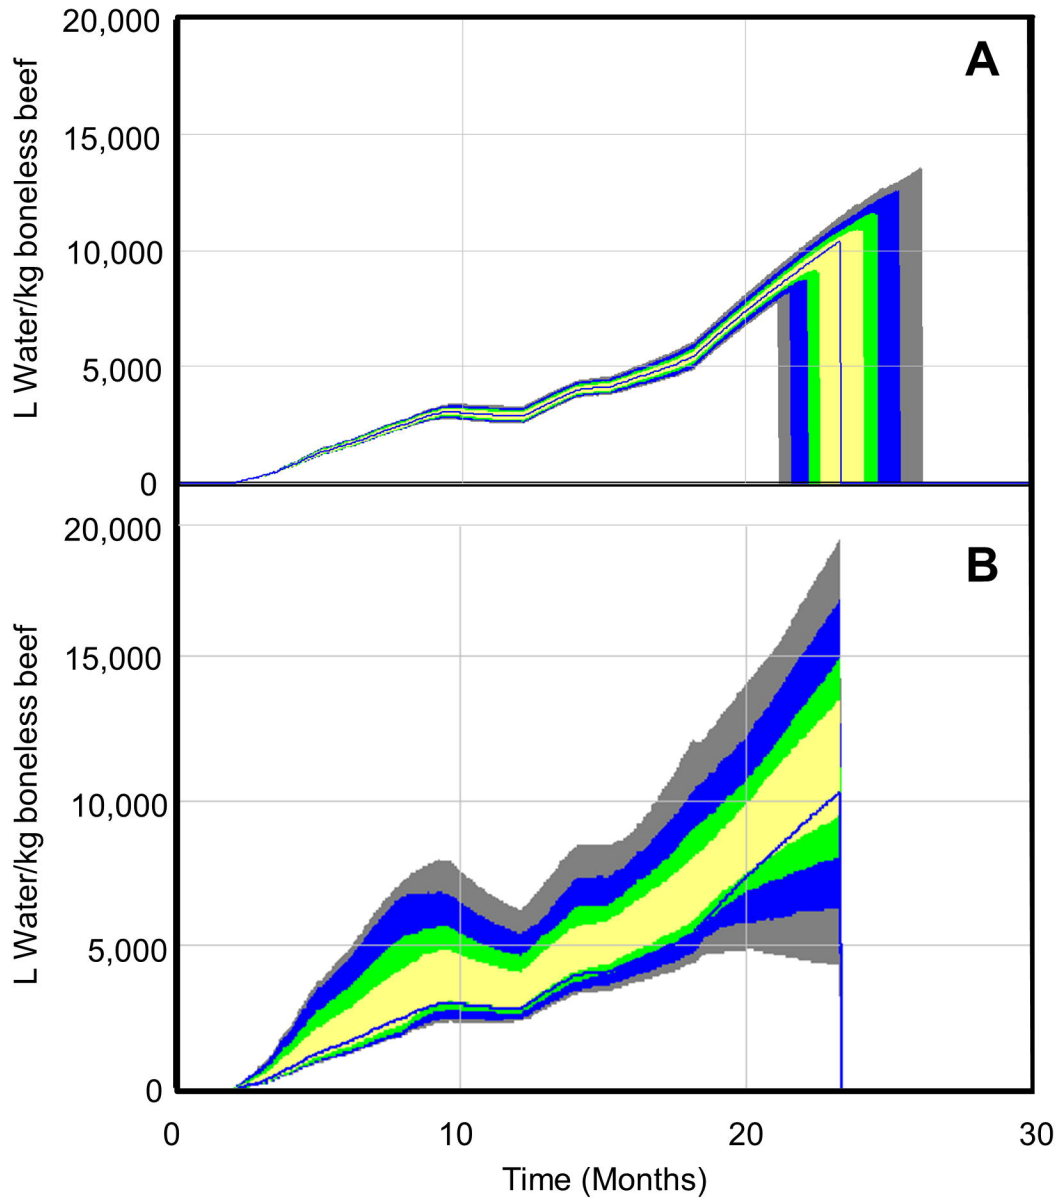

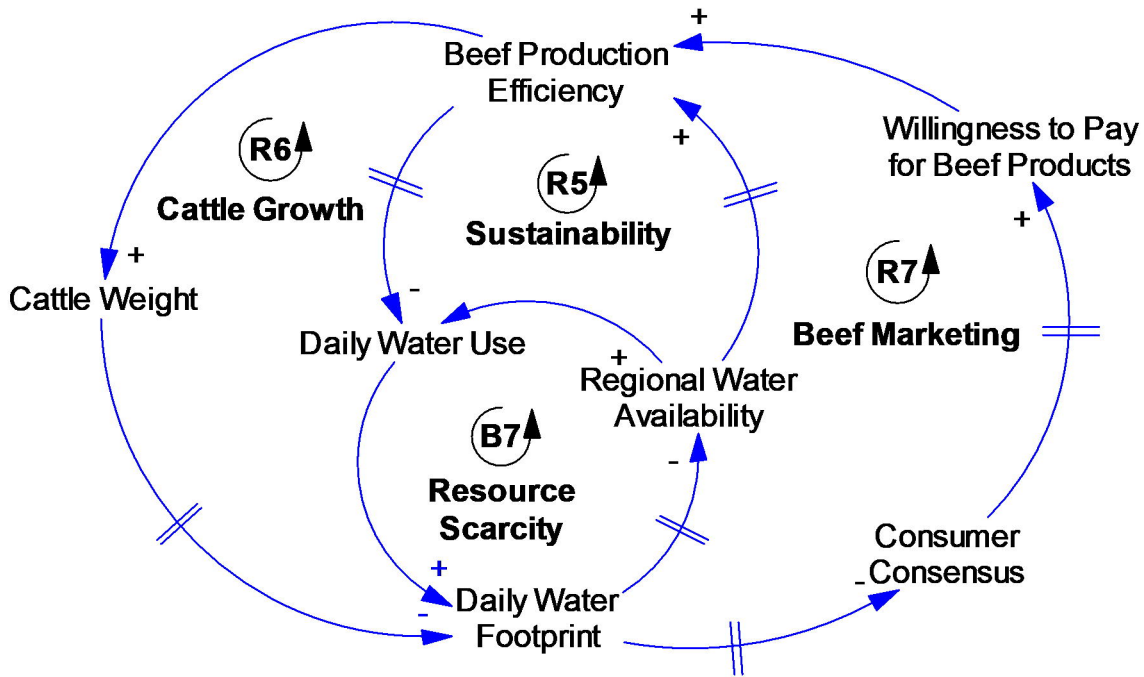

Source: https://www.biorxiv.org/content/10.1101/2020.04.14.028324v1.full.pdf
